# Supplementary material for: Examining Ethnicity: Patterns of Minority Identification Among Children of Interethnic Marriages in China
Source: Oxford University Press journal article supplement (doi:10.1215/00703370-10061919), 2022-06-27
Supplement: francis-tan_esm.pdf [file francis-tan_esm.pdf]

**Table A1. Population size of ethnic groups in China, 2000 and 2010**

| Name in Chinese | Name in English | Population in 2000 | Population in 2010 | Name in Chinese | Name in English | Population in 2000 | Population in 2010 |
|-----------------|-----------------|--------------------|--------------------|-----------------|-----------------|--------------------|--------------------|
| 汉族              | Han             | 1,137,386,112      | 1,220,844,520      | 土族              | Tu              | 241,198            | 289,565            |
| 蒙古族             | Mongol          | 5,813,947          | 5,981,840          | 达斡尔族            | Daur            | 132,394            | 131,992            |
| 回族              | Hui             | 9,816,805          | 10,586,087         | 佤族              | Mulao           | 207,352            | 216,257            |
| 藏族              | Tibetan         | 5,416,021          | 6,282,187          | 羌族              | Qiang           | 306,072            | 309,576            |
| 维吾尔族            | Uyghur          | 8,399,393          | 10,069,346         | 布朗族             | Blang           | 91,882             | 119,639            |
| 苗族              | Miao            | 8,940,116          | 9,426,007          | 撒拉族             | Salar           | 104,503            | 130,607            |
| 彝族              | Yi              | 7,762,272          | 8,714,393          | 毛南族             | Maonan          | 107,166            | 101,192            |
| 壮族              | Zhuang          | 16,178,811         | 16,926,381         | 仡佬族             | Gelao           | 579,357            | 550,746            |
| 布依族             | Bouyei          | 2,971,460          | 2,870,034          | 锡伯族             | Xibe            | 188,824            | 190,481            |
| 朝鲜族             | Korean          | 1,923,842          | 1,830,929          | 阿昌族             | Achang          | 33,936             | 39,555             |
| 满族              | Manchu          | 10,682,262         | 10,387,958         | 普米族             | Pumi            | 33,600             | 42,861             |
| 侗族              | Dong            | 2,960,293          | 2,879,974          | 塔吉克族            | Tajik           | 41,028             | 51,069             |
| 瑶族              | Yao             | 2,637,421          | 2,796,003          | 怒族              | Nu              | 28,759             | 37,523             |
| 白族              | Bai             | 1,858,063          | 1,933,510          | 乌孜别克族           | Uzbek           | 12,370             | 10,569             |
| 土家族             | Tujia           | 8,028,133          | 8,353,912          | 俄罗斯族            | Russian         | 15,609             | 15,393             |
| 哈尼族             | Hani            | 1,439,673          | 1,660,932          | 鄂温克族            | Ewenki          | 30,505             | 30,875             |
| 哈萨克族            | Kazakh          | 1,250,458          | 1,462,588          | 德昂族             | Deang           | 17,935             | 20,556             |
| 傣族              | Dai             | 1,158,989          | 1,261,311          | 保安族             | Bonan           | 16,505             | 20,074             |
| 黎族              | Li              | 1,247,814          | 1,463,064          | 裕固族             | Yugur           | 13,719             | 14,378             |
| 傈僳族             | Lisu            | 634,912            | 702,839            | 京族              | Gin             | 22,517             | 28,199             |
| 佤族              | Va              | 396,610            | 429,709            | 塔塔尔族            | Tatars          | 4,890              | 3,556              |
| 畲族              | She             | 709,592            | 708,651            | 独龙族             | Derung          | 7,426              | 6,930              |
| 高山族             | Gaoshan         | 4,461              | 4,009              | 鄂伦春族            | Oroqen          | 8,196              | 8,659              |
| 拉祜族             | Lahu            | 453,705            | 485,966            | 赫哲族             | Hezhen          | 4,640              | 5,354              |
| 水族              | Sui             | 406,902            | 411,847            | 门巴族             | Monba           | 8,923              | 10,561             |
| 东乡族             | Dongxiang       | 513,805            | 621,500            | 珞巴族             | Lhoba           | 2,965              | 3,682              |
| 纳西族             | Nakhi           | 308,839            | 326,295            | 基诺族             | Jino            | 20,899             | 23,143             |
| 景颇族             | Jingpo          | 132,143            | 147,828            | 其他未识别的          | Unknown         | 734,438            | 640,101            |
| 柯尔克孜族           | Kyrgyz          | 160,823            | 186,708            | 外国人加入中          | Naturalized     | 941                | 1,448              |

NOTE. Source: <http://www.stats.gov.cn/tjsj/pcs/>

**Table A2. Detailed information on bonus points for ethnic minorities, circa 2018**

| Province       | Policy details                                                                                                                                                                                                                                                                                                                                                                                                                                                                                                                                                                                                                                                                                                                                                                                                                                                                                                                                                                                                                                                                                                                                                                                                                                                                                 |
|----------------|------------------------------------------------------------------------------------------------------------------------------------------------------------------------------------------------------------------------------------------------------------------------------------------------------------------------------------------------------------------------------------------------------------------------------------------------------------------------------------------------------------------------------------------------------------------------------------------------------------------------------------------------------------------------------------------------------------------------------------------------------------------------------------------------------------------------------------------------------------------------------------------------------------------------------------------------------------------------------------------------------------------------------------------------------------------------------------------------------------------------------------------------------------------------------------------------------------------------------------------------------------------------------------------------|
| Beijing        | Ethnic minority students who have transferred from borderlands, mountainous areas, pastoral areas and minority concentrated areas to Beijing during stage of senior high school receive 5 bonus points when applying to Beijing municipal institutions of higher education. All other ethnic minority students, under the same circumstances as Han candidates, will be given priority for admission.                                                                                                                                                                                                                                                                                                                                                                                                                                                                                                                                                                                                                                                                                                                                                                                                                                                                                          |
| Tianjin        | Ethnic minority students receive 5 bonus points when applying to Tianjin municipal institutions of higher education.                                                                                                                                                                                                                                                                                                                                                                                                                                                                                                                                                                                                                                                                                                                                                                                                                                                                                                                                                                                                                                                                                                                                                                           |
| Hebei          | Ethnic minority students living in ethnic autonomous counties receive 10 bonus points.                                                                                                                                                                                                                                                                                                                                                                                                                                                                                                                                                                                                                                                                                                                                                                                                                                                                                                                                                                                                                                                                                                                                                                                                         |
| Shanxi         | Under the same circumstances as Han candidates, ethnic minority students will be given priority for admission.                                                                                                                                                                                                                                                                                                                                                                                                                                                                                                                                                                                                                                                                                                                                                                                                                                                                                                                                                                                                                                                                                                                                                                                 |
| Inner Mongolia | Mongol, Daur, Russian, Ewenki, and Oroqen students receive 10 bonus points.                                                                                                                                                                                                                                                                                                                                                                                                                                                                                                                                                                                                                                                                                                                                                                                                                                                                                                                                                                                                                                                                                                                                                                                                                    |
| Liaoning       | Ethnic minority students living in Kazuo, Fuxin Mongolian Autonomous County, Xinbin, Qingyuan, Fengcheng, Xiuyan, Kuandian, Beizhen, Benxi and Huanren Manchu Autonomous County receive 5 bonus points. Korean and Mongolian students graduated from bilingual programs in ethnic middle schools receive 5 bonus points when applying to institutions of higher education in Liaoning. All other ethnic minority students, under the same circumstances as Han candidates, will be given priority for admission.                                                                                                                                                                                                                                                                                                                                                                                                                                                                                                                                                                                                                                                                                                                                                                               |
| Jilin          | Ethnic minority students living in minority concentrated areas (Korean students from Yanbian Korean Autonomous Prefecture and Changbai Korean Autonomous County, Manchu students from Yitong Manchu Autonomous County, and Mongolian students from Qianguoerluosi Mongolian Autonomous County) receive 5 bonus points.                                                                                                                                                                                                                                                                                                                                                                                                                                                                                                                                                                                                                                                                                                                                                                                                                                                                                                                                                                         |
| Heilongjiang   | Mongol, Kyrgyz, Daur, Xibe, Russian, Ewenki, Oroqen, and Hezhen students receive 10 bonus point when applying to institutions of higher education in Heilongjiang. Ethnic minority students who use their ethnic language during the college entrance exam receive 5 bonus points. Ethnic minority students from autonomous counties, ethnic areas, and ethnic townships (locally registered residence for 3 years or more and 3 years' school places and actual learning in local high schools) receive 5 bonus points.                                                                                                                                                                                                                                                                                                                                                                                                                                                                                                                                                                                                                                                                                                                                                                       |
| Shanghai       | Ethnic minority students who have transferred from borderlands, mountainous areas, pastoral areas and minority concentrated areas to Shanghai receive 5 bonus points.                                                                                                                                                                                                                                                                                                                                                                                                                                                                                                                                                                                                                                                                                                                                                                                                                                                                                                                                                                                                                                                                                                                          |
| Jiangsu        | Ethnic minority students receive 3 bonus points when applying to institutions of higher education in Jiangsu.                                                                                                                                                                                                                                                                                                                                                                                                                                                                                                                                                                                                                                                                                                                                                                                                                                                                                                                                                                                                                                                                                                                                                                                  |
| Zhejiang       | Ethnic minority students living in Jingning She Autonomous County, ethnic townships and ethnic villages receive 5 bonus points. Han students receive 3 bonus points if the student is locally registered and completed the entire stage of senior high school in Jingning She Autonomous County.                                                                                                                                                                                                                                                                                                                                                                                                                                                                                                                                                                                                                                                                                                                                                                                                                                                                                                                                                                                               |
| Anhui          | Ethnic minority students living in minority concentrated areas receive 5 bonus points. All other ethnic minority students, under the same circumstances as Han candidates, will be given priority for admission.                                                                                                                                                                                                                                                                                                                                                                                                                                                                                                                                                                                                                                                                                                                                                                                                                                                                                                                                                                                                                                                                               |
| Fujian         | She students living in She concentrated areas, Hui students living in Hui concentrated areas, Gaoshan students living in Gaoshan concentrated areas, and all ethnic minority students living in mountainous areas and islands receive 10 bonus points. All other ethnic minority students, under the same circumstances as Han candidates, will be given priority for admission.                                                                                                                                                                                                                                                                                                                                                                                                                                                                                                                                                                                                                                                                                                                                                                                                                                                                                                               |
| Jiangxi        | Ethnic minority students living in ethnic townships (8 ethnic townships such as Zhangping She ethnic township, Guixi City) and ethnic villages (82 ethnic villages such as Changshou She ethnic village, Chenfang Township, Qianshan County) receive 5 bonus points. All other ethnic minority students, under the same circumstances as Han candidates, will be given priority for admission.                                                                                                                                                                                                                                                                                                                                                                                                                                                                                                                                                                                                                                                                                                                                                                                                                                                                                                 |
| Shandong       | Ethnic minority students living in mountainous areas and minority concentrated areas receive 5 bonus points when applying to institutions of higher education in Shandong.                                                                                                                                                                                                                                                                                                                                                                                                                                                                                                                                                                                                                                                                                                                                                                                                                                                                                                                                                                                                                                                                                                                     |
| Henan          | Ethnic minority students receive 5 bonus points.                                                                                                                                                                                                                                                                                                                                                                                                                                                                                                                                                                                                                                                                                                                                                                                                                                                                                                                                                                                                                                                                                                                                                                                                                                               |
| Hubei          | Ethnic minority students living in minority concentrated areas (including Enshi City, Lichuan City, Jianshi County, Badong County, Xuanen County, Xianfeng County, Laifeng County, and Hefeng County in Enshi Tujia Autonomous Prefecture; and Changyang Tujia Autonomous County and Wufeng Tujia Autonomous County in Yichang City) receive 10 bonus points. All other ethnic minority students, under the same circumstances as Han candidates, will be given priority for admission.                                                                                                                                                                                                                                                                                                                                                                                                                                                                                                                                                                                                                                                                                                                                                                                                        |
| Hunan          | Ethnic minority students living in ethnic autonomous prefectures and counties, and ethnic townships receive 20 bonus points. Ethnic minority students living in six counties with more than half of the population being ethnic minorities, such as Jiangyong County, Suining County, Huitong County, Yuanling County, Cili County and Shimen County receive 10 bonus points when applying to institutions of higher education in Hunan. Han students living in ethnic autonomous prefectures and counties, ethnic townships, and the six counties receive 5 bonus points when applying to institutions of higher education in Hunan. All other ethnic minority students receive 5 bonus points when applying to institutions of higher education in Hunan.                                                                                                                                                                                                                                                                                                                                                                                                                                                                                                                                    |
| Guangdong      | Ethnic minority students receive no bonus points if applying for bachelor programs in universities. Ethnic minority students living in minority concentrated areas or migrated to Guangdong from minority concentrated areas in other provinces receive 5 bonus points if applying for associate degree programs.                                                                                                                                                                                                                                                                                                                                                                                                                                                                                                                                                                                                                                                                                                                                                                                                                                                                                                                                                                              |
| Guangxi        | Students from 10 indigenous ethnic minority groups (Hui, Miao, Yi, Dong, Yao, Sui, Jingpo, Mulao, Maonan, Gelao) except for those living in the urban areas of 5 cities (Nanning, Liuzhou, Guilin, Wuzhou, Beihai), in accord with the "Three Consistent" policy (San Tong Yi, the place of residential registration, place of school enrollment, and actual place of school attending are consistent), receive 20 bonus points. Ethnic minority students living in 28 ethnic autonomous counties, mountainous counties, and borderlands, in accord with the "Three Consistent" policy, receive 20 bonus points. Ethnic minority students in 22 mountainous counties, in accord with the "Three Consistent" policy, receive 10 bonus points. All other ethnic minority students except for those living in the urban areas of 5 cities, in accord with the "Three Consistent" policy, receive 7 bonus points. Ethnic minority students living in the urban areas of 5 cities receive 5 bonus points. Han students living in 28 ethnic autonomous counties, mountainous counties, and borderlands, in accord with the "Three Consistent" policy, receive 15 bonus points. Han students living in 22 mountainous counties, in accord with the "Three Consistent" policy, receive 7 bonus points. |

|           |                                                                                                                                                                                                                                                                                                                                                                                                                                                                                                                                                                                                                                                                                                                                                                                                                                                                                                                                                                                                                                                                                                                                                                                                                                                                                                                                                                         |
|-----------|-------------------------------------------------------------------------------------------------------------------------------------------------------------------------------------------------------------------------------------------------------------------------------------------------------------------------------------------------------------------------------------------------------------------------------------------------------------------------------------------------------------------------------------------------------------------------------------------------------------------------------------------------------------------------------------------------------------------------------------------------------------------------------------------------------------------------------------------------------------------------------------------------------------------------------------------------------------------------------------------------------------------------------------------------------------------------------------------------------------------------------------------------------------------------------------------------------------------------------------------------------------------------------------------------------------------------------------------------------------------------|
| Hainan    | Ethnic minority students receive 15 bonus points if the residential registrations of the student and his/her legal guardian are at minority concentrated areas, the student attended and graduated from a senior high school at minority concentrated areas, and will attend the college entrance exam in the cities or counties of the minority concentrated areas. Ethnic minority students receive 5 bonus points if the residential registrations of the student and his/her legal guardian are at minority concentrated areas, but the student attended and graduated from a senior high school at non-minority concentrated areas. Han students receive 3 bonus points if the residential registrations of the student and his/her legal guardian have been at minority concentrated areas for five years (for children whose parents migrated on special talents programs or are in military services, three years), the student attended and graduated from a senior high school at minority concentrated areas, and will attend the college entrance exam in the cities or counties of the minority concentrated areas.                                                                                                                                                                                                                                        |
| Chongqing | Ethnic minority students living in ethnic autonomous counties and ethnic townships receive 10 bonus points. All other ethnic minority students, under the same circumstances as Han candidates, will be given priority for admission.                                                                                                                                                                                                                                                                                                                                                                                                                                                                                                                                                                                                                                                                                                                                                                                                                                                                                                                                                                                                                                                                                                                                   |
| Sichuan   | Ethnic minority students living in three ethnic minority prefectures, seventeen counties, and two townships receive 25 bonus points for first-tier universities and 50 bonus points for other universities. Han students living in those areas receive 10 bonus points for first-tier universities and 25 bonus points for other universities. Ethnic minority students living in East District and West District of Panzhihua city receive 10 bonus points for first-tier universities and 25 bonus points for other universities. Han students living those areas receive 5 bonus points for first-tier universities and 10 bonus points for other universities. All other ethnic minority students, under the same circumstances as Han candidates, will be given priority for admission.                                                                                                                                                                                                                                                                                                                                                                                                                                                                                                                                                                            |
| Guizhou   | Ethnic minority students living in Yunyan District, Nanming District, Huaxi District, Wudang District, Baiyun District and Guanshanhu District of Guiyang City, Honghuagang District and Huichuan District of Zunyi City and Xixiu District of Anshun City receive 10 bonus points. All other ethnic minority students receive 20 points (including cities, districts and special zones).                                                                                                                                                                                                                                                                                                                                                                                                                                                                                                                                                                                                                                                                                                                                                                                                                                                                                                                                                                               |
| Yunnan    | Ethnic minority students living in borderlands receive 20 bonus points. Mongol, Tibetan, Miao, Bouyei, Yao, Hani, Dai, Lisu, Va, Lahu, Sui, Jingpo, Blang, Achang, Pumi, Nu, Deang, Derung, and Jino students living in the inlands receive 10 bonus points. Yi and Zhuang students with rural residential registrations in the inlands receive 10 bonus points. Ethnic minority students living in poverty mountainous areas receive 20 bonus points. Han students receive 20 bonus points if they were native to borderlands or migrated with parents to borderlands and have locally registered and attended local schools for at least 10 years. The aforementioned Han students receive 10 bonus points if they attended senior high school in the inlands.                                                                                                                                                                                                                                                                                                                                                                                                                                                                                                                                                                                                        |
| Tibet     | For ethnic minority students who have lived for more than two generations (including two generations) in Tibet, separate admission criteria will be adopted. All other ethnic minority students following the Han admission receive 10 bonus points. Monba, Lhoba, Deng, and Sherpa students receive 10 bonus points.                                                                                                                                                                                                                                                                                                                                                                                                                                                                                                                                                                                                                                                                                                                                                                                                                                                                                                                                                                                                                                                   |
| Shaanxi   | Ethnic minority students scattered in the Han nationality areas, under the same circumstances as Han candidates, will be given priority for admission.                                                                                                                                                                                                                                                                                                                                                                                                                                                                                                                                                                                                                                                                                                                                                                                                                                                                                                                                                                                                                                                                                                                                                                                                                  |
| Gansu     | Ethnic minority students living in minority concentrated areas receive 20 bonus points. Ethnic minority students scattered in the Han nationality areas, under the same circumstances as Han candidates, will be given priority for admission. Han students living in minority concentrated areas, when applying to majors of sciences, engineering, and arts in institutions of higher education in Gansu, receive 10 bonus points.                                                                                                                                                                                                                                                                                                                                                                                                                                                                                                                                                                                                                                                                                                                                                                                                                                                                                                                                    |
| Qinghai   | Ethnic minority students receive 20 bonus points. When they apply to provincial colleges and universities across the country, 15 bonus points will be further added to ethnic minority students in the six ethnic autonomous prefectures, with a cumulative bonus of 35 bonus points. Ethnic minority students living in Yushu Tibetan Autonomous Prefecture, Guoluo Tibetan Autonomous Prefecture, and Huangnan Tibetan Autonomous Prefecture and who have received the same education as Han students from primary school to senior high school, attended the same college entrance exam, and apply to institutions of higher education in Qinghai, receive an extra 10 bonus points in addition to other bonus points. Han students receive 10 bonus points if their parents have worked in the six ethnic autonomous prefectures for at least 15 years or have been indigenous, they are locally registered, and they receive the same education as local ethnic minority students from primary school to senior high school. Exceptions are for Han students living in Yushu Tibetan Autonomous Prefecture and Guoluo Tibetan Autonomous Prefecture, who have attended local schools during the entire period of junior high school to senior high school and whose parents have worked locally for at least 10 years. These Han students receive 20 bonus points. |
| Ningxia   | Hui students receive 20 bonus points, and all other ethnic minority students receive 10 bonus points. Han students, non-Hui ethnic minority students, and Hui students respectively receive 10, 20, and 30 bonus points if they are residentially registered in Guyuan City or Mountainous Areas (Hongsibao District, Yanchi County, Tongxin County, Haiyuan County), and enrolled and attended local senior high schools.                                                                                                                                                                                                                                                                                                                                                                                                                                                                                                                                                                                                                                                                                                                                                                                                                                                                                                                                              |
| Xinjiang  | Students of 11 ethnic groups, including Tibetan, Mongol, Uyghur, Kazakh, Kyrgyz, Daur, Xibe, Tajik, Uzbek, Russian, and Tatar who take the college entrance exam through the Chinese language program, and students of other ethnic minority groups who take the college entrance exam through the ethnic language program, receive 15 bonus points. Hui students receive 5 bonus points if they take the college entrance exam through the Chinese language and bilingual programs. Any students living in the Southern Xinjiang Four Areas/Prefectures (Hetian Area, Kashgar Area, Kizilsu Kyrgyz Autonomous Prefecture, Aksu Area) who take the college entrance exam through the Chinese language program, in accord with the Southern Xinjiang Special Program (Nan Jiang Dan Lie Ji Hua, benefiting those who are locally registered and enrolled in local senior high schools for at least three years, and the parents or guardians are also locally registered), receive 10 bonus points.                                                                                                                                                                                                                                                                                                                                                                      |

NOTE. The table provides information about bonus points on the gaokao for ethnic minorities applying to 4-year universities in their province of registration. For current information on bonus points by province, please refer to <http://gaokao.eol.cn> and <http://www.gaokao.com>.
